# Supplementary material
Source: Elsevier journal article supplement (http://authors.library.caltech.edu/78156/3/mmc2.xlsx)
Supplement: mmc2 [file mmc2.xlsx]

## Sheet: Table S1
Table S1. δD and ages of lunar plutonic rocks and basalts
sample	type	rock	phase	age (Ga)	2	δD (‰)	2	-2	reference	notes
60015	FAN	ferroan anorthosite	plagioclase	4.46	0.04	340	110	110	this study	model age, Norman03MaPS
14305,303	Alkali-suite	alkali anorthosite	apatite	4.199	0.171	238	72	72	Greenwood11NG	A14 alkali anorthosite age range, Shearer06RiMG
14305,303	Alkali-suite	alkali anorthosite	apatite	4.199	0.171	341	53	53	Greenwood11NG	A14 alkali anorthosite age range, Shearer06RiMG
14303,205	Alkali-suite	granite	apatite	4.308	0.004	-184	375	375	Barnes14EPSL	Zircon age, Meyer96MaPS
14303,205	Alkali-suite	granite	apatite	4.308	0.004	35	216	216	Barnes14EPSL	Zircon age, Meyer96MaPS
14303,205	Alkali-suite	granite	apatite	4.308	0.004	-321	390	390	Barnes14EPSL	Zircon age, Meyer96MaPS
14303,205	Alkali-suite	granite	apatite	4.308	0.004	-139	97	97	Barnes14EPSL	Zircon age, Meyer96MaPS
14303,205	Alkali-suite	granite	apatite	4.308	0.004	110	295	295	Barnes14EPSL	Zircon age, Meyer96MaPS
72275,469	Alkali-suite	KREEP basalt	apatite	4.13	0.08	184	316	316	Tartese14Geology	Rb-Sr age, Shih92EPSL
72275,469	Alkali-suite	KREEP basalt	apatite	4.13	0.08	-105	293	293	Tartese14Geology	Rb-Sr age, Shih92EPSL
72275,469	Alkali-suite	KREEP basalt	apatite	4.13	0.08	-139	249	249	Tartese14Geology	Rb-Sr age, Shih92EPSL
72275,469	Alkali-suite	KREEP basalt	apatite	4.13	0.08	15	228	228	Tartese14Geology	Rb-Sr age, Shih92EPSL
72275,469	Alkali-suite	KREEP basalt	apatite	4.13	0.08	-81	460	460	Tartese14Geology	Rb-Sr age, Shih92EPSL
72275,469	Alkali-suite	KREEP basalt	apatite	4.13	0.08	-118	386	386	Tartese14Geology	Rb-Sr age, Shih92EPSL
72275,469	Alkali-suite	KREEP basalt	apatite	4.13	0.08	-129	213	213	Tartese14Geology	Rb-Sr age, Shih92EPSL
72275,469	Alkali-suite	KREEP basalt	apatite	4.13	0.08	187	254	254	Tartese14Geology	Rb-Sr age, Shih92EPSL
72275,469	Alkali-suite	KREEP basalt	apatite	4.13	0.08	-143	162	162	Tartese14Geology	Rb-Sr age, Shih92EPSL
72275,469	Alkali-suite	KREEP basalt	apatite	4.13	0.08	-180	172	172	Tartese14Geology	Rb-Sr age, Shih92EPSL
72275,469	Alkali-suite	KREEP basalt	apatite	4.13	0.08	-157	133	133	Tartese14Geology	Rb-Sr age, Shih92EPSL
72275,469	Alkali-suite	KREEP basalt	apatite	4.13	0.08	-277	211	211	Tartese14Geology	Rb-Sr age, Shih92EPSL
NWA773	Alkali-suite	olivine-grabbro	apatite	2.993	0.033	-169	113	113	Tartese14Geology	Sm-Nd age, Borg09GCA
NWA773	Alkali-suite	olivine-grabbro	apatite	2.993	0.033	-273	139	139	Tartese14Geology	Sm-Nd age, Borg09GCA
NWA773	Alkali-suite	olivine-grabbro	apatite	2.993	0.033	184	140	140	Tartese14Geology	Sm-Nd age, Borg09GCA
NWA773	Alkali-suite	olivine-grabbro	apatite	2.993	0.033	23	90	90	Tartese14Geology	Sm-Nd age, Borg09GCA
NWA773	Alkali-suite	olivine-grabbro	apatite	2.993	0.033	-44	125	125	Tartese14Geology	Sm-Nd age, Borg09GCA
NWA773	Alkali-suite	olivine-grabbro	apatite	2.993	0.033	-54	124	124	Tartese14Geology	Sm-Nd age, Borg09GCA
NWA773	Alkali-suite	olivine-grabbro	apatite	2.993	0.033	-64	145	145	Tartese14Geology	Sm-Nd age, Borg09GCA
NWA773	Alkali-suite	olivine-grabbro	apatite	2.993	0.033	3	92	92	Tartese14Geology	Sm-Nd age, Borg09GCA
NWA773	Alkali-suite	olivine-grabbro	apatite	2.993	0.033	38	98	98	Tartese14Geology	Sm-Nd age, Borg09GCA
77215,202	Mg-suite	norite	apatite	4.42	0.04	-205	163	163	Barnes14EPSL	Rb-Sr age, Nakamura76PLSC
77215,202	Mg-suite	norite	apatite	4.42	0.04	-299	84	84	Barnes14EPSL	Rb-Sr age, Nakamura76PLSC
77215,202	Mg-suite	norite	apatite	4.42	0.04	-234	203	203	Barnes14EPSL	Rb-Sr age, Nakamura76PLSC
77215,202	Mg-suite	norite	apatite	4.42	0.04	-271	95	95	Barnes14EPSL	Rb-Sr age, Nakamura76PLSC
77215,202	Mg-suite	norite	apatite	4.42	0.04	-264	132	132	Barnes14EPSL	Rb-Sr age, Nakamura76PLSC
77215,202	Mg-suite	norite	apatite	4.42	0.04	-384	175	175	Barnes14EPSL	Rb-Sr age, Nakamura76PLSC
78235,43	Mg-suite	norite	apatite	4.366	0.053	203	237	238	Barnes14EPSL	Rb-Sr age, Edmunson09GCA
78235,43	Mg-suite	norite	apatite	4.366	0.053	-152	159	159	Barnes14EPSL	Rb-Sr age, Edmunson09GCA
78235,43	Mg-suite	norite	apatite	4.366	0.053	18	107	107	Barnes14EPSL	Rb-Sr age, Edmunson09GCA
78235,43	Mg-suite	norite	apatite	4.366	0.053	-14	125	125	Barnes14EPSL	Rb-Sr age, Edmunson09GCA
78235,43	Mg-suite	norite	apatite	4.366	0.053	-52	79	79	Barnes14EPSL	Rb-Sr age, Edmunson09GCA
74220	melt inclusion	pyroclasts	melt inclusion	3.48	0.03	187	19	19	Saal13Science	Pb-Pb age, Tera76ALPSC
74220	melt inclusion	pyroclasts	melt inclusion	3.48	0.03	327	32	32	Saal13Science	Pb-Pb age, Tera76ALPSC
74220	melt inclusion	pyroclasts	melt inclusion	3.48	0.03	311	37	37	Saal13Science	Pb-Pb age, Tera76ALPSC
74220	melt inclusion	pyroclasts	melt inclusion	3.48	0.03	245	46	46	Saal13Science	Pb-Pb age, Tera76ALPSC
74220	melt inclusion	pyroclasts	melt inclusion	3.48	0.03	281	32	32	Saal13Science	Pb-Pb age, Tera76ALPSC
14053,256	14053	high-Al basalt	apatite	3.96	0.04	-172	24	24	Greenwood11NG	Rb-Sr age, Papanastassiou71EPSL
14053,256	14053	high-Al basalt	apatite	3.96	0.04	-215	96	96	Greenwood11NG	Rb-Sr age, Papanastassiou71EPSL
14053,256	14053	high-Al basalt	apatite	3.96	0.04	-175	37	37	Greenwood11NG	Rb-Sr age, Papanastassiou71EPSL
14053,256	14053	high-Al basalt	apatite	3.96	0.04	-202	23	23	Greenwood11NG	Rb-Sr age, Papanastassiou71EPSL
14053,257	14053	high-Al basalt	apatite	3.96	0.04	-202	31	31	Greenwood11NG	Rb-Sr age, Papanastassiou71EPSL
14053,257	14053	high-Al basalt	apatite	3.96	0.04	-179	40	40	Greenwood11NG	Rb-Sr age, Papanastassiou71EPSL
74220	degassed basalt	pyroclasts	matrix glass	3.48	0.03	347	168	-245	Saal13Science	Pb-Pb age, Tera76ALPSC
74220	degassed basalt	pyroclasts	matrix glass	3.48	0.03	458	68	-88	Saal13Science	Pb-Pb age, Tera76ALPSC
74220	degassed basalt	pyroclasts	matrix glass	3.48	0.03	329	51	-61	Saal13Science	Pb-Pb age, Tera76ALPSC
74220	degassed basalt	pyroclasts	matrix glass	3.48	0.03	428	186	-275	Saal13Science	Pb-Pb age, Tera76ALPSC
10044,12	degassed basalt	mare basalt	apatite	3.71	0.11	622	126	126	Greenwood11NG	Rb-Sr age, Papanastassiou70EPSL
10044,644	degassed basalt	mare basalt	apatite	3.71	0.11	636	38	38	Greenwood11NG	Rb-Sr age, Papanastassiou70EPSL
10044,644	degassed basalt	mare basalt	apatite	3.71	0.11	567	36	36	Greenwood11NG	Rb-Sr age, Papanastassiou70EPSL
10044,644	degassed basalt	mare basalt	apatite	3.71	0.11	600	83	83	Greenwood11NG	Rb-Sr age, Papanastassiou70EPSL
10044,645	degassed basalt	mare basalt	apatite	3.71	0.11	622	48	48	Barnes13CG	Rb-Sr age, Papanastassiou70EPSL
10044,645	degassed basalt	mare basalt	apatite	3.71	0.11	623	49	49	Barnes13CG	Rb-Sr age, Papanastassiou70EPSL
10044,645	degassed basalt	mare basalt	apatite	3.71	0.11	657	63	63	Barnes13CG	Rb-Sr age, Papanastassiou70EPSL
10044,645	degassed basalt	mare basalt	apatite	3.71	0.11	682	46	46	Barnes13CG	Rb-Sr age, Papanastassiou70EPSL
10044,645	degassed basalt	mare basalt	apatite	3.71	0.11	1005	46	46	Barnes13CG	Rb-Sr age, Papanastassiou70EPSL
10044,645	degassed basalt	mare basalt	apatite	3.71	0.11	1013	58	58	Barnes13CG	Rb-Sr age, Papanastassiou70EPSL
10044,645	degassed basalt	mare basalt	apatite	3.71	0.11	697	49	49	Barnes13CG	Rb-Sr age, Papanastassiou70EPSL
10044,645	degassed basalt	mare basalt	apatite	3.71	0.11	631	66	66	Barnes13CG	Rb-Sr age, Papanastassiou70EPSL
10044,645	degassed basalt	mare basalt	apatite	3.71	0.11	617	64	64	Barnes13CG	Rb-Sr age, Papanastassiou70EPSL
10044,645	degassed basalt	mare basalt	apatite	3.71	0.11	796	56	56	Barnes13CG	Rb-Sr age, Papanastassiou70EPSL
10044,645	degassed basalt	mare basalt	apatite	3.71	0.11	710	61	61	Barnes13CG	Rb-Sr age, Papanastassiou70EPSL
10044,645	degassed basalt	mare basalt	apatite	3.71	0.11	772	54	54	Barnes13CG	Rb-Sr age, Papanastassiou70EPSL
10044,645	degassed basalt	mare basalt	apatite	3.71	0.11	697	69	69	Barnes13CG	Rb-Sr age, Papanastassiou70EPSL
10044,645	degassed basalt	mare basalt	apatite	3.71	0.11	675	63	63	Barnes13CG	Rb-Sr age, Papanastassiou70EPSL
10044,645	degassed basalt	mare basalt	apatite	3.71	0.11	533	85	85	Barnes13CG	Rb-Sr age, Papanastassiou70EPSL
10044,645	degassed basalt	mare basalt	apatite	3.71	0.11	635	77	77	Barnes13CG	Rb-Sr age, Papanastassiou70EPSL
10044,645	degassed basalt	mare basalt	apatite	3.71	0.11	818	70	70	Barnes13CG	Rb-Sr age, Papanastassiou70EPSL
10044,645	degassed basalt	mare basalt	apatite	3.71	0.11	891	63	63	Barnes13CG	Rb-Sr age, Papanastassiou70EPSL
10058,46	degassed basalt	mare basalt	apatite	3.63	0.2	724	74	74	Tartese13GCA	Rb-Sr age, Papanastassiou70EPSL
10058,46	degassed basalt	mare basalt	apatite	3.63	0.2	949	80	80	Tartese13GCA	Rb-Sr age, Papanastassiou70EPSL
10058,46	degassed basalt	mare basalt	apatite	3.63	0.2	1098	79	79	Tartese13GCA	Rb-Sr age, Papanastassiou70EPSL
10058,46	degassed basalt	mare basalt	apatite	3.63	0.2	678	84	84	Tartese13GCA	Rb-Sr age, Papanastassiou70EPSL
10058,46	degassed basalt	mare basalt	apatite	3.63	0.2	648	82	82	Tartese13GCA	Rb-Sr age, Papanastassiou70EPSL
10058,46	degassed basalt	mare basalt	apatite	3.63	0.2	735	86	86	Tartese13GCA	Rb-Sr age, Papanastassiou70EPSL
10058,46	degassed basalt	mare basalt	apatite	3.63	0.2	965	84	84	Tartese13GCA	Rb-Sr age, Papanastassiou70EPSL
10058,46	degassed basalt	mare basalt	apatite	3.63	0.2	929	79	79	Tartese13GCA	Rb-Sr age, Papanastassiou70EPSL
10058,46	degassed basalt	mare basalt	apatite	3.63	0.2	884	85	85	Tartese13GCA	Rb-Sr age, Papanastassiou70EPSL
10058,46	degassed basalt	mare basalt	apatite	3.63	0.2	618	77	77	Tartese13GCA	Rb-Sr age, Papanastassiou70EPSL
12039,42	degassed basalt	mare basalt	apatite	3.19	0.06	680	30	30	Greenwood11NG	Rb-Sr age, Nyquist77PLSC
12039,42	degassed basalt	mare basalt	apatite	3.19	0.06	730	31	31	Greenwood11NG	Rb-Sr age, Nyquist77PLSC
12039,42	degassed basalt	mare basalt	apatite	3.19	0.06	672	35	35	Greenwood11NG	Rb-Sr age, Nyquist77PLSC
12039,42	degassed basalt	mare basalt	apatite	3.19	0.06	792	38	38	Greenwood11NG	Rb-Sr age, Nyquist77PLSC
12039,42	degassed basalt	mare basalt	apatite	3.19	0.06	472	63	63	Greenwood11NG	Rb-Sr age, Nyquist77PLSC
12039,42	degassed basalt	mare basalt	apatite	3.19	0.06	542	65	65	Greenwood11NG	Rb-Sr age, Nyquist77PLSC
12039,42	degassed basalt	mare basalt	apatite	3.19	0.06	391	62	62	Greenwood11NG	Rb-Sr age, Nyquist77PLSC
12039,42	degassed basalt	mare basalt	apatite	3.19	0.06	655	74	74	Greenwood11NG	Rb-Sr age, Nyquist77PLSC
12039,42	degassed basalt	mare basalt	apatite	3.19	0.06	498	83	83	Greenwood11NG	Rb-Sr age, Nyquist77PLSC
12039,42	degassed basalt	mare basalt	apatite	3.19	0.06	875	40	40	Greenwood11NG	Rb-Sr age, Nyquist77PLSC
12039,42	degassed basalt	mare basalt	apatite	3.19	0.06	747	50	50	Greenwood11NG	Rb-Sr age, Nyquist77PLSC
12039,42	degassed basalt	mare basalt	apatite	3.19	0.06	1010	47	47	Greenwood11NG	Rb-Sr age, Nyquist77PLSC
12039,42	degassed basalt	mare basalt	apatite	3.19	0.06	892	45	45	Greenwood11NG	Rb-Sr age, Nyquist77PLSC
12039,44	degassed basalt	mare basalt	apatite	3.19	0.06	904	67	67	Tartese13GCA	Rb-Sr age, Nyquist77PLSC
12039,44	degassed basalt	mare basalt	apatite	3.19	0.06	967	65	65	Tartese13GCA	Rb-Sr age, Nyquist77PLSC
12039,44	degassed basalt	mare basalt	apatite	3.19	0.06	880	66	66	Tartese13GCA	Rb-Sr age, Nyquist77PLSC
12039,44	degassed basalt	mare basalt	apatite	3.19	0.06	767	63	63	Tartese13GCA	Rb-Sr age, Nyquist77PLSC
12039,44	degassed basalt	mare basalt	apatite	3.19	0.06	785	68	68	Tartese13GCA	Rb-Sr age, Nyquist77PLSC
12039,44	degassed basalt	mare basalt	apatite	3.19	0.06	812	60	60	Tartese13GCA	Rb-Sr age, Nyquist77PLSC
12039,44	degassed basalt	mare basalt	apatite	3.19	0.06	860	69	69	Tartese13GCA	Rb-Sr age, Nyquist77PLSC
12039,44	degassed basalt	mare basalt	apatite	3.19	0.06	889	67	67	Tartese13GCA	Rb-Sr age, Nyquist77PLSC
12039,44	degassed basalt	mare basalt	apatite	3.19	0.06	875	72	72	Tartese13GCA	Rb-Sr age, Nyquist77PLSC
12039,44	degassed basalt	mare basalt	apatite	3.19	0.06	822	65	65	Tartese13GCA	Rb-Sr age, Nyquist77PLSC
12039,44	degassed basalt	mare basalt	apatite	3.19	0.06	882	79	79	Tartese13GCA	Rb-Sr age, Nyquist77PLSC
12039,44	degassed basalt	mare basalt	apatite	3.19	0.06	991	61	61	Tartese13GCA	Rb-Sr age, Nyquist77PLSC
12039,44	degassed basalt	mare basalt	apatite	3.19	0.06	915	62	62	Tartese13GCA	Rb-Sr age, Nyquist77PLSC
12064,136	degassed basalt	mare basalt	apatite	3.18	0.09	880	72	72	Barnes13CG	Rb-Sr age, Papanastassiou71EPSL
12064,136	degassed basalt	mare basalt	apatite	3.18	0.09	831	74	74	Barnes13CG	Rb-Sr age, Papanastassiou71EPSL
12064,136	degassed basalt	mare basalt	apatite	3.18	0.09	1009	72	72	Barnes13CG	Rb-Sr age, Papanastassiou71EPSL
12064,136	degassed basalt	mare basalt	apatite	3.18	0.09	854	72	72	Barnes13CG	Rb-Sr age, Papanastassiou71EPSL
12064,136	degassed basalt	mare basalt	apatite	3.18	0.09	1008	71	71	Barnes13CG	Rb-Sr age, Papanastassiou71EPSL
12064,136	degassed basalt	mare basalt	apatite	3.18	0.09	960	73	73	Barnes13CG	Rb-Sr age, Papanastassiou71EPSL
12064,136	degassed basalt	mare basalt	apatite	3.18	0.09	849	72	72	Barnes13CG	Rb-Sr age, Papanastassiou71EPSL
12064,136	degassed basalt	mare basalt	apatite	3.18	0.09	940	75	75	Barnes13CG	Rb-Sr age, Papanastassiou71EPSL
12064,136	degassed basalt	mare basalt	apatite	3.18	0.09	786	62	62	Barnes13CG	Rb-Sr age, Papanastassiou71EPSL
12064,136	degassed basalt	mare basalt	apatite	3.18	0.09	955	45	45	Barnes13CG	Rb-Sr age, Papanastassiou71EPSL
12064,136	degassed basalt	mare basalt	apatite	3.18	0.09	947	45	45	Barnes13CG	Rb-Sr age, Papanastassiou71EPSL
12064,136	degassed basalt	mare basalt	apatite	3.18	0.09	911	45	45	Barnes13CG	Rb-Sr age, Papanastassiou71EPSL
12064,136	degassed basalt	mare basalt	apatite	3.18	0.09	798	47	47	Barnes13CG	Rb-Sr age, Papanastassiou71EPSL
12064,136	degassed basalt	mare basalt	apatite	3.18	0.09	811	38	38	Barnes13CG	Rb-Sr age, Papanastassiou71EPSL
15058,20	degassed basalt	mare basalt	apatite	3.46	0.04	565	73	73	Tartese13GCA	Rb-Sr age, Birck75EPSL
15058,20	degassed basalt	mare basalt	apatite	3.46	0.04	637	73	73	Tartese13GCA	Rb-Sr age, Birck75EPSL
15058,20	degassed basalt	mare basalt	apatite	3.46	0.04	637	103	103	Tartese13GCA	Rb-Sr age, Birck75EPSL
15058,20	degassed basalt	mare basalt	apatite	3.46	0.04	611	109	109	Tartese13GCA	Rb-Sr age, Birck75EPSL
15058,20	degassed basalt	mare basalt	apatite	3.46	0.04	483	125	125	Tartese13GCA	Rb-Sr age, Birck75EPSL
15058,20	degassed basalt	mare basalt	apatite	3.46	0.04	556	106	106	Tartese13GCA	Rb-Sr age, Birck75EPSL
15058,20	degassed basalt	mare basalt	apatite	3.46	0.04	647	87	87	Tartese13GCA	Rb-Sr age, Birck75EPSL
15058,20	degassed basalt	mare basalt	apatite	3.46	0.04	510	69	69	Tartese13GCA	Rb-Sr age, Birck75EPSL
15386,45	degassed basalt	KREEP basalt	apatite	3.94	0.01	595	144	144	Tartese14Geology	Rb-Sr age, Nyquist75PLSC
15386,45	degassed basalt	KREEP basalt	apatite	3.94	0.01	538	151	151	Tartese14Geology	Rb-Sr age, Nyquist75PLSC
15386,45	degassed basalt	KREEP basalt	apatite	3.94	0.01	778	123	123	Tartese14Geology	Rb-Sr age, Nyquist75PLSC
15386,45	degassed basalt	KREEP basalt	apatite	3.94	0.01	89	99	99	Tartese14Geology	Rb-Sr age, Nyquist75PLSC
15386,45	degassed basalt	KREEP basalt	apatite	3.94	0.01	413	170	170	Tartese14Geology	Rb-Sr age, Nyquist75PLSC
15386,45	degassed basalt	KREEP basalt	apatite	3.94	0.01	296	127	127	Tartese14Geology	Rb-Sr age, Nyquist75PLSC
15386,45	degassed basalt	KREEP basalt	apatite	3.94	0.01	465	118	118	Tartese14Geology	Rb-Sr age, Nyquist75PLSC
15386,45	degassed basalt	KREEP basalt	apatite	3.94	0.01	321	149	149	Tartese14Geology	Rb-Sr age, Nyquist75PLSC
15386,45	degassed basalt	KREEP basalt	apatite	3.94	0.01	615	217	217	Tartese14Geology	Rb-Sr age, Nyquist75PLSC
15386,45	degassed basalt	KREEP basalt	apatite	3.94	0.01	140	180	180	Tartese14Geology	Rb-Sr age, Nyquist75PLSC
15386,45	degassed basalt	KREEP basalt	apatite	3.94	0.01	311	234	234	Tartese14Geology	Rb-Sr age, Nyquist75PLSC
15386,45	degassed basalt	KREEP basalt	apatite	3.94	0.01	426	135	135	Tartese14Geology	Rb-Sr age, Nyquist75PLSC
15555,991	degassed basalt	mare basalt	apatite	3.34	0.09	454	145	145	Tartese13GCA	Rb-Sr age, Birck75EPSL
15555,991	degassed basalt	mare basalt	apatite	3.34	0.09	682	115	115	Tartese13GCA	Rb-Sr age, Birck75EPSL
15555,991	degassed basalt	mare basalt	apatite	3.34	0.09	520	76	76	Tartese13GCA	Rb-Sr age, Birck75EPSL
15555,991	degassed basalt	mare basalt	apatite	3.34	0.09	578	56	56	Tartese13GCA	Rb-Sr age, Birck75EPSL
15555,991	degassed basalt	mare basalt	apatite	3.34	0.09	715	102	102	Tartese13GCA	Rb-Sr age, Birck75EPSL
15555,991	degassed basalt	mare basalt	apatite	3.34	0.09	632	63	63	Tartese13GCA	Rb-Sr age, Birck75EPSL
75055,55	degassed basalt	mare basalt	apatite	3.77	0.06	735	36	36	Greenwood11NG	Rb-Sr age, Tera74EPSL
LAP04841,19	degassed basalt	mare basalt	apatite	2.99	0.018	515	38	38	Tartese13GCA	Rb-Sr age, Rankenburg07GCA
MIL05035,30	degassed basalt	mare basalt	apatite	3.851	0.008	237	39	39	Tartese13GCA	Baddeleyite age, Zhang10SCES
MIL05035,30	degassed basalt	mare basalt	apatite	3.851	0.008	283	117	117	Tartese13GCA	Baddeleyite age, Zhang10SCES
MIL05035,30	degassed basalt	mare basalt	apatite	3.851	0.008	93	75	75	Tartese13GCA	Baddeleyite age, Zhang10SCES
MIL05035,30	degassed basalt	mare basalt	apatite	3.851	0.008	157	101	101	Tartese13GCA	Baddeleyite age, Zhang10SCES
MIL05035,37	degassed basalt	mare basalt	apatite	3.851	0.008	443	32	32	Tartese13GCA	Baddeleyite age, Zhang10SCES
74002,1238,1042	degassed basalt	pyroclasts	matrix glass	3.67	0.05	74	66	66	Füri14Icarus	Ar-Ar age, Saito79PLC
74002,1238,1042	degassed basalt	pyroclasts	matrix glass	3.67	0.05	75	64	64	Füri14Icarus	Ar-Ar age, Saito79PLC
74002,1238,1042	degassed basalt	pyroclasts	matrix glass	3.67	0.05	76	64	64	Füri14Icarus	Ar-Ar age, Saito79PLC
74002,1238,1042	degassed basalt	pyroclasts	matrix glass	3.67	0.05	97	65	65	Füri14Icarus	Ar-Ar age, Saito79PLC
74002,1238,1042	degassed basalt	pyroclasts	matrix glass	3.67	0.05	38	61	61	Füri14Icarus	Ar-Ar age, Saito79PLC
74002,1238,1042	degassed basalt	pyroclasts	matrix glass	3.67	0.05	158	95	94	Füri14Icarus	Ar-Ar age, Saito79PLC
74002,1238,1042	degassed basalt	pyroclasts	matrix glass	3.67	0.05	263	90	90	Füri14Icarus	Ar-Ar age, Saito79PLC
74002,1238,1042	degassed basalt	pyroclasts	matrix glass	3.67	0.05	182	98	98	Füri14Icarus	Ar-Ar age, Saito79PLC
74002,1238,1042	degassed basalt	pyroclasts	matrix glass	3.67	0.05	389	108	108	Füri14Icarus	Ar-Ar age, Saito79PLC
74002,1238,1042	degassed basalt	pyroclasts	matrix glass	3.67	0.05	366	90	90	Füri14Icarus	Ar-Ar age, Saito79PLC
74002,1238,1042	degassed basalt	pyroclasts	matrix glass	3.67	0.05	335	86	86	Füri14Icarus	Ar-Ar age, Saito79PLC
74002,1238,1042	degassed basalt	pyroclasts	matrix glass	3.67	0.05	481	82	81	Füri14Icarus	Ar-Ar age, Saito79PLC
74002,1238,1042	degassed basalt	pyroclasts	matrix glass	3.67	0.05	161	62	62	Füri14Icarus	Ar-Ar age, Saito79PLC
74002,1238,1042	degassed basalt	pyroclasts	matrix glass	3.67	0.05	357	71	71	Füri14Icarus	Ar-Ar age, Saito79PLC
74002,1238,1042	degassed basalt	pyroclasts	matrix glass	3.67	0.05	342	82	82	Füri14Icarus	Ar-Ar age, Saito79PLC
74002,1238,1042	degassed basalt	pyroclasts	matrix glass	3.67	0.05	300	68	68	Füri14Icarus	Ar-Ar age, Saito79PLC
74002,1238,1042	degassed basalt	pyroclasts	matrix glass	3.67	0.05	361	85	85	Füri14Icarus	Ar-Ar age, Saito79PLC
74002,1238,1042	degassed basalt	pyroclasts	matrix glass	3.67	0.05	136	94	94	Füri14Icarus	Ar-Ar age, Saito79PLC
74002,1238,1042	degassed basalt	pyroclasts	matrix glass	3.67	0.05	210	94	93	Füri14Icarus	Ar-Ar age, Saito79PLC
74002,1238,1042	degassed basalt	pyroclasts	matrix glass	3.67	0.05	157	94	94	Füri14Icarus	Ar-Ar age, Saito79PLC
74002,1238,1042	degassed basalt	pyroclasts	matrix glass	3.67	0.05	300	103	103	Füri14Icarus	Ar-Ar age, Saito79PLC
74002,1238,1042	degassed basalt	pyroclasts	matrix glass	3.67	0.05	203	87	87	Füri14Icarus	Ar-Ar age, Saito79PLC
74002,1238,1042	degassed basalt	pyroclasts	matrix glass	3.67	0.05	180	77	77	Füri14Icarus	Ar-Ar age, Saito79PLC
74002,1238,1042	degassed basalt	pyroclasts	matrix glass	3.67	0.05	154	66	66	Füri14Icarus	Ar-Ar age, Saito79PLC
74002,1238,1042	degassed basalt	pyroclasts	matrix glass	3.67	0.05	315	80	80	Füri14Icarus	Ar-Ar age, Saito79PLC
74002,1238,1042	degassed basalt	pyroclasts	matrix glass	3.67	0.05	273	75	75	Füri14Icarus	Ar-Ar age, Saito79PLC
74002,1238,1042	degassed basalt	pyroclasts	matrix glass	3.67	0.05	177	89	89	Füri14Icarus	Ar-Ar age, Saito79PLC
74002,1238,1042	degassed basalt	pyroclasts	matrix glass	3.67	0.05	233	68	67	Füri14Icarus	Ar-Ar age, Saito79PLC
74002,1238,1042	degassed basalt	pyroclasts	matrix glass	3.67	0.05	271	70	70	Füri14Icarus	Ar-Ar age, Saito79PLC
74002,1238,1042	degassed basalt	pyroclasts	matrix glass	3.67	0.05	439	85	85	Füri14Icarus	Ar-Ar age, Saito79PLC
74002,1238,1042	degassed basalt	pyroclasts	matrix glass	3.67	0.05	390	76	76	Füri14Icarus	Ar-Ar age, Saito79PLC
74002,1238,1042	degassed basalt	pyroclasts	matrix glass	3.67	0.05	109	62	62	Füri14Icarus	Ar-Ar age, Saito79PLC
74002,1238,1042	degassed basalt	pyroclasts	matrix glass	3.67	0.05	237	73	73	Füri14Icarus	Ar-Ar age, Saito79PLC
74002,1238,1042	degassed basalt	pyroclasts	matrix glass	3.67	0.05	421	83	83	Füri14Icarus	Ar-Ar age, Saito79PLC
74002,1238,1042	degassed basalt	pyroclasts	matrix glass	3.67	0.05	659	115	115	Füri14Icarus	Ar-Ar age, Saito79PLC
74002,1238,1042	degassed basalt	pyroclasts	matrix glass	3.67	0.05	268	67	67	Füri14Icarus	Ar-Ar age, Saito79PLC
74002,1238,1042	degassed basalt	pyroclasts	matrix glass	3.67	0.05	176	67	67	Füri14Icarus	Ar-Ar age, Saito79PLC
74002,1238,1042	degassed basalt	pyroclasts	matrix glass	3.67	0.05	294	71	71	Füri14Icarus	Ar-Ar age, Saito79PLC
74002,1238,1042	degassed basalt	pyroclasts	matrix glass	3.67	0.05	417	78	78	Füri14Icarus	Ar-Ar age, Saito79PLC
74002,1238,1042	degassed basalt	pyroclasts	matrix glass	3.67	0.05	317	77	76	Füri14Icarus	Ar-Ar age, Saito79PLC
74002,1238,1042	degassed basalt	pyroclasts	matrix glass	3.67	0.05	142	71	71	Füri14Icarus	Ar-Ar age, Saito79PLC
74002,1238,1042	degassed basalt	pyroclasts	matrix glass	3.67	0.05	67	73	72	Füri14Icarus	Ar-Ar age, Saito79PLC
74002,1238,1042	degassed basalt	pyroclasts	matrix glass	3.67	0.05	131	74	74	Füri14Icarus	Ar-Ar age, Saito79PLC
74002,1238,1042	degassed basalt	pyroclasts	matrix glass	3.67	0.05	123	74	74	Füri14Icarus	Ar-Ar age, Saito79PLC
74002,1238,1042	degassed basalt	pyroclasts	matrix glass	3.67	0.05	144	77	77	Füri14Icarus	Ar-Ar age, Saito79PLC
74002,1238,1042	degassed basalt	pyroclasts	matrix glass	3.67	0.05	88	74	74	Füri14Icarus	Ar-Ar age, Saito79PLC
74002,1238,1042	degassed basalt	pyroclasts	matrix glass	3.67	0.05	337	76	75	Füri14Icarus	Ar-Ar age, Saito79PLC
74002,1238,1042	degassed basalt	pyroclasts	matrix glass	3.67	0.05	218	62	62	Füri14Icarus	Ar-Ar age, Saito79PLC
74002,1238,1042	degassed basalt	pyroclasts	matrix glass	3.67	0.05	327	66	66	Füri14Icarus	Ar-Ar age, Saito79PLC
74002,1238,1042	degassed basalt	pyroclasts	matrix glass	3.67	0.05	411	73	73	Füri14Icarus	Ar-Ar age, Saito79PLC
74002,1238,1042	degassed basalt	pyroclasts	matrix glass	3.67	0.05	382	68	68	Füri14Icarus	Ar-Ar age, Saito79PLC
74002,1238,1042	degassed basalt	pyroclasts	matrix glass	3.67	0.05	369	71	71	Füri14Icarus	Ar-Ar age, Saito79PLC
74002,1238,1042	degassed basalt	pyroclasts	matrix glass	3.67	0.05	115	60	60	Füri14Icarus	Ar-Ar age, Saito79PLC
74002,1238,1042	degassed basalt	pyroclasts	matrix glass	3.67	0.05	96	61	61	Füri14Icarus	Ar-Ar age, Saito79PLC
74002,1238,1042	degassed basalt	pyroclasts	matrix glass	3.67	0.05	207	80	80	Füri14Icarus	Ar-Ar age, Saito79PLC
74002,1238,1042	degassed basalt	pyroclasts	matrix glass	3.67	0.05	449	122	122	Füri14Icarus	Ar-Ar age, Saito79PLC
74002,1238,1042	degassed basalt	pyroclasts	matrix glass	3.67	0.05	421	111	111	Füri14Icarus	Ar-Ar age, Saito79PLC
74002,1238,1042	degassed basalt	pyroclasts	matrix glass	3.67	0.05	300	105	105	Füri14Icarus	Ar-Ar age, Saito79PLC
74002,1238,1042	degassed basalt	pyroclasts	matrix glass	3.67	0.05	337	87	87	Füri14Icarus	Ar-Ar age, Saito79PLC
74002,1238,1042	degassed basalt	pyroclasts	matrix glass	3.67	0.05	353	77	77	Füri14Icarus	Ar-Ar age, Saito79PLC
74002,1238,1042	degassed basalt	pyroclasts	matrix glass	3.67	0.05	278	70	70	Füri14Icarus	Ar-Ar age, Saito79PLC
74002,1238,1042	degassed basalt	pyroclasts	matrix glass	3.67	0.05	471	93	92	Füri14Icarus	Ar-Ar age, Saito79PLC
74002,1238,1042	degassed basalt	pyroclasts	matrix glass	3.67	0.05	366	78	78	Füri14Icarus	Ar-Ar age, Saito79PLC
74002,1238,1042	degassed basalt	pyroclasts	matrix glass	3.67	0.05	195	61	61	Füri14Icarus	Ar-Ar age, Saito79PLC
74002,1238,1042	degassed basalt	pyroclasts	matrix glass	3.67	0.05	267	74	74	Füri14Icarus	Ar-Ar age, Saito79PLC
74002,1238,1042	degassed basalt	pyroclasts	matrix glass	3.67	0.05	809	107	106	Füri14Icarus	Ar-Ar age, Saito79PLC
74002,1238,1042	degassed basalt	pyroclasts	matrix glass	3.67	0.05	617	101	100	Füri14Icarus	Ar-Ar age, Saito79PLC
74002,1238,1042	degassed basalt	pyroclasts	matrix glass	3.67	0.05	428	86	86	Füri14Icarus	Ar-Ar age, Saito79PLC
74002,1238,1042	degassed basalt	pyroclasts	matrix glass	3.67	0.05	319	83	83	Füri14Icarus	Ar-Ar age, Saito79PLC
74002,1238,1042	degassed basalt	pyroclasts	matrix glass	3.67	0.05	217	60	60	Füri14Icarus	Ar-Ar age, Saito79PLC
74002,1238,1042	degassed basalt	pyroclasts	matrix glass	3.67	0.05	310	82	82	Füri14Icarus	Ar-Ar age, Saito79PLC
74002,1238,1042	degassed basalt	pyroclasts	matrix glass	3.67	0.05	272	68	68	Füri14Icarus	Ar-Ar age, Saito79PLC
74002,1238,1042	degassed basalt	pyroclasts	matrix glass	3.67	0.05	484	89	89	Füri14Icarus	Ar-Ar age, Saito79PLC
74002,1238,1042	degassed basalt	pyroclasts	matrix glass	3.67	0.05	488	104	101	Füri14Icarus	Ar-Ar age, Saito79PLC
74002,1238,1042	degassed basalt	pyroclasts	matrix glass	3.67	0.05	479	110	107	Füri14Icarus	Ar-Ar age, Saito79PLC
references
A. E. Saal, E. H. Hauri, J. A. Van Orman, M. J. Rutherford, Hydrogen isotopes in lunar volcanic glasses and melt inclusions reveal a carbonaceous chondrite heritage, Science 340, 1317-1320 (2013).
A. Zhang et al., SIMS Pb/Pb dating of Zr-rich minerals in lunar meteorites Miller Range 05035 and LaPaz Icefield 02224: Implications for the petrogenesis of mare basalt. Sci. China Earth Sci. 53, 327-334 (2010).
C. K. Shearer et al., Thermal and magmatic evolution of the Moon. Rev. Mineral. Geochem. 60, 365-518 (2006).
C. Meyer, I. A. Williams, W. Compston, Uranium-lead ages for lunar zircons: Evidence for a prolonged period of granophyre formation from 4.32 to 3.88 Ga. Meteor. Planet. Sci. 31, 370-387 (1996).
C.-Y. Shih et al., Rb-Sr and Sm-Nd chronology of an Apollo 17 KREEP basalt. Earth Planet. Sci. Lett. 108, 203-215 (1992).
D. A. Papanastassiou, G. J. Wasserburg, D. S. Burnett, Rb-Sr ages of Lunar rocks from the sea of tranquillity. Earth Planet. Sci. Lett. 8, 1-19 (1970).
D. A. Papanastassiou, G. J. Wasserburg, Lunar chronology and evolution from Rb-Sr studies of Apollo 11 and 12 samples. Earth Planet. Sci. Lett. 11, 37-62 (1971).
D. A. Papanastassiou, G. J. Wasserburg, Rb-Sr ages of igneous rocks from the Apollo 14 mission and the age of the Fra Mauro formation. Earth Planet. Sci. Lett. 12, 36-48 (1971).
E. Füri et al., New evidence for chondritic lunar water from combined D/H and noble gas analyses of single Apollo 17 volcanic glasses. Icarus 229, 109-120 (2014).
F. Tera, D. A. Papanastassiou, G. J. Wasserburg, Isotopic evidence for a terminal lunar cataclysm. Earth Planet. Sci. Lett. 22, 1-21 (1974).
F. Tera, G. J. Wasserburg, Lunar ball games and other sports. Abs. Lunar Planet. Sci. Conf. 858-860 (1976).
J. Edmunson, L. E. Borg, L. E. Nyquist, Y. Asmerom, A combined Sm-Nd, Rb-Sr, and U-Pb isotopic study of Mg-suite norite 78238: Further evidence for early differentiation of the Moon. Geochim. Cosmochim. Acta 73, 514-527 (2009).
J. J. Barnes et al., Accurate and precise measurements of the D/H ratio and hydroxyl content in lunar apatites using NanoSIMS. Chem. Geol. 337, 48–55 (2013).
J. J. Barnes et al., The origin of water in the primitive Moon as revealed by the lunar highlands samples, Earth Planet. Sci. Lett. 390, 244-252 (2014).
J. L. Birck, S. Fourcade, C. Allegre, 87Rb-86Sr age of rocks from the Apollo 15 landing site and significance of internal isochron. Earth planet. Sci. Lett. 26, 29-35 (1975).
J. P. Greenwood et al., Hydrogen isotope ratios in lunar rocks indicate delivery of cometary water to the Moon. Nat. Geosci. 4, 79-82 (2011).
K. Rankenburg, A. D. Brandon, M. D. Norman, A Rb-Sr and Sm-Nd isotope geochronology and trace element study of lunar meteorite LaPaz Icefield 02205. Geochim. Cosmochim. Acta 71, 2120-2135 (2007).
K. Saito, E. C. Alexander, 40Ar-39Ar studies of lunar soil 74001 (abs). Lunar Sci. X, 1049. Lunar Planetary Institute, Houston (1979).
L. E. Borg et al., Mechanisms for incompatible-element enrichment on the Moon deduced from the lunar basaltic meteorite Northwest Africa 032. Geochim. Cosmochim. Acta 73, 3963-3980 (2009).
L. E. Nyquist et al., A comparative Rb-Sr, Sm-Nd, and K-Ar study of shocked norite 78236: Evidence of slow cooling in the lunar crust? Proc. Lunar Planet. Sci. 12B, 67-97 (1981).
L. E. Nyquist et al., Sr-isotopic constrains on the petrogenesis of Apollo 12 mare basalts. Proc. Lunar Sci. Conf. 8, 1383-1415 (1977).
L. E. Nyquist, B. M. Bansal, H. Wiesmann, Rb-Sr ages and initial 87Sr/86Sr for Apollo 17 basalts and KREEP basalt 15386. Proc. Lunar Sci. Conf. 6, 1445-1465 (1975).
M. D. Norman et al., Chronology, geochemistry, and petrology of a ferroan noritic anorthosite clast from Descartes breccia 67215: Clues to the age, origin, structure, and impact history of the lunar crust. Meteor. Planet. Sci. 38, 645-661 (2003).
N. Nakamura et al., 4.4 b.y.-old clast in Boulder 7, Apollo 17: A comprehensive chronological study by U-Pb, Rb-Sr and Sm-Nd methods. Proc. Lunar Sci. Conf. 7, 2309-2333 (1976).
R. Tartèse et al., Apatites in lunar KREEP basalts: The missing link to understanding the H isotope systematics of the Moon. Geology 42, 363-366 (2014).
R. Tartèse et al., The abundance, distribution, and isotopic composition of hydrogen in the Moon as revealed by basaltic lunar samples: Implications for the volatile inventory of the Moon. Geochim. Cosmochim. Acta 122, 58–74 (2013).
